# Supplementary material for: Hypertrophic Pachymeningitis in Chinese Patients: Presentation, Radiological Findings, and Clinical Course
Source: Hindawi journal article supplement (doi:10.1155/2020/2926419), 2020-01-01
Supplement: f1 [file 2926419.f1.pdf]

**Table S1:** CSF findings in 16 cases with HP.

| Case | ICP | WBC | Pandy | Pro  | Glu  | Cl    | IgA   | IgG   | IgM  |
|------|-----|-----|-------|------|------|-------|-------|-------|------|
| 1    | 110 | 3   | +     | 5200 | 8.13 | 116.7 | 64.9  | 716.0 | 4.9  |
| 2    | 135 | 14  | -     | 785  | 2.85 | 124.1 | 32.6  | 157   | 12.1 |
| 3    | 120 | 0   | -     | 263  | 4.13 | 122.2 | 2.7   | 21.8  | 0.2  |
| 4    | 115 | 0   | -     | 213  | 3.72 | 127.0 | 0.9   | 15.2  | 0.2  |
| 5    | 130 | 10  | -     | 472  | 4.79 | 130.4 | 4.7   | 88.9  | 0.9  |
| 6    | 150 | 0   | +     | 627  | 3.77 | 129.5 | 8.0   | 143.0 | 6.5  |
| 7    | 140 | 4   | +     | 524  | 4.58 | 119.6 | 8.4   | 96.1  | 3.5  |
| 8    | 280 | 96  | +     | 5548 | 5.21 | 118.5 | 111.0 | 2440  | 60   |
| 9    | 265 | 60  | +     | 1150 | 3.22 | 123.5 | 26.5  | 530   | 7.3  |
| 10   | 135 | 5   | +     | 524  | 3.59 | 125.2 | 9.6   | 86.9  | 1.3  |
| 11   | 120 | 0   | -     | 187  | 4.66 | 127.7 | 0.9   | 14.5  | 0.5  |
| 12   | 290 | 0   | -     | 230  | 3.55 | 123.8 | 5.8   | 24.8  | 0.4  |
| 13   | 100 | 2   | +     | 1094 | 4.27 | 128.0 | 34.1  | 309   | 16.2 |
| 14   | 260 | 2   | -     | 1557 | 5.59 | 125.4 | 20.5  | 195   | 4.3  |
| 15   | 130 | 20  | +     | 1375 | 3.93 | 126.2 | 35.5  | 955   | 30.1 |
| 16   | 120 | 1   | -     | 361  | 3.23 | 126.1 | 2.5   | 32.6  | 1.0  |

Cl=chloride (mmol/L), CSF=cerebrospinal fluid, Glu=glucose (mmol/L), HP=hypertrophic pachymeningitis, ICP=intracranial pressure (mmH<sub>2</sub>O), Ig=Immunoglobulin (mg/L), Pandy=Pandy's test, Pro=protein (mg/L), WBC=white blood cell ( $\times 10^6$ /L), +=positive, -=negative.
